# Supplementary material for: Effectiveness of a drinking-motive-tailored emergency-room intervention among adolescents admitted to hospital due to acute alcohol intoxication — A randomized controlled trial
Source: PubMed Central journal article supplement — Prev Med Rep. 2015 Dec 24;3:83–9. doi: 10.1016/j.pmedr.2015.12.009 (PMC4733092; doi:10.1016/j.pmedr.2015.12.009), 2015-12-24
Supplement: mmc1.pdf [file mmc1.pdf]

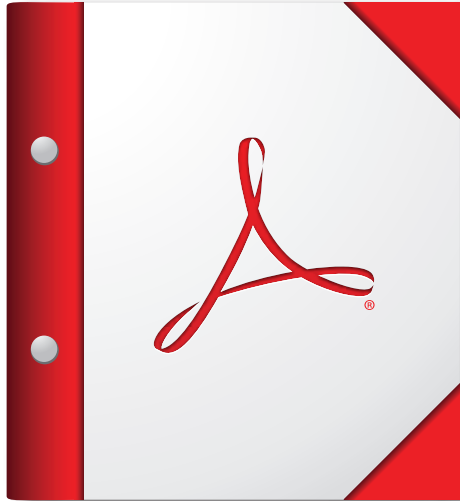

**For the best experience, open this PDF portfolio in  
Acrobat 9 or Adobe Reader 9, or later.**

[Get Adobe Reader Now!](#)
